# Supplementary material
Source: ML conference proceedings conference paper supplement (https://proceedings.neurips.cc/paper_files/paper/2019/hash/85422afb467e9456013a2a51d4dff702-Abstract.html)
Supplement: Supplementary file [file 85422afb467e9456013a2a51d4dff702-Supplemental.zip]

---

# Powerset Convolutional Neural Networks

## Supplementary Material

---

**Chris Wendler**

Department of Computer Science  
ETH Zurich, Switzerland  
chris.wendler@inf.ethz.ch

**Dan Alistarh**

IST Austria  
dan.alistarh@ist.ac.at

**Markus Püschel**

Department of Computer Science  
ETH Zurich, Switzerland  
pueschel@inf.ethz.ch

## 1 Complexity Analysis

**Definition 1.** (Powerset convolutional layer) *A powerset convolutional layer is defined as follows:*

1. The input is given by  $n_c$  set functions  $\mathbf{s} = (s^{(1)}, \dots, s^{(n_c)}) \in \mathbb{R}^{2^N \times n_c}$ ;
2. The output is given by  $n_f$  set functions  $\mathbf{t} = L_\Gamma(\mathbf{s}) = (t^{(1)}, \dots, t^{(n_f)}) \in \mathbb{R}^{2^N \times n_f}$ ;
3. The layer applies a bank of set function filters  $\Gamma = (h^{(i,j)})_{i,j}$ , with  $i \in \{1, \dots, n_c\}$  and  $j \in \{1, \dots, n_f\}$ , and a point-wise non-linearity  $\sigma$  resulting in

$$t_A^{(j)} = \sigma\left(\sum_{i=1}^{n_c} (h^{(i,j)} * s^{(i)})_A\right). \quad (1)$$

While the provided Tensorflow is prototypical, our analysis assumes fast implementations. Consider a powerset convolutional layer (1) with  $n_c$  input channels and  $n_f$  output channels. Convolution is done efficiently in the Fourier domain, i.e.,  $h * s = F^{-1}(\text{diag}(\bar{F}h)Fs)$ , which requires  $\frac{3}{2}n2^n + 2^n$  operations and  $2^n$  floats of memory due to the Kronecker-structure of the frequency response  $\bar{F}$  and Fourier transform  $F$ .

**Operations** A *forward pass* requires  $n_c n_f (\frac{3}{2}n2^n + 2^n)$  operations, as for each input- and output channel one convolution is performed. For the *backward pass* the Jacobian  $\frac{\partial t^{(j)}}{\partial h^{(i,j)}} = \text{diag}((\frac{\partial \sigma}{\partial x_A^{(j)}})_{A \subseteq N}) I_{2^n} F^{-1} \text{diag}(\hat{s}^{(i)}) \bar{F}$  is multiplied by the  $1 \times 2^n$  accumulated Jacobian of the consecutive layers  $\Delta_{t^{(j)}}$  from the left requiring  $n2^n + 2^{n+1}$  operations. Doing this for all filters  $h^{(i,j)}$  yields  $n_c n_f (n2^n + 2^{n+1})$ . Similarly, computing all  $\Delta_{t^{(j)}} \frac{\partial t^{(j)}}{\partial s^{(i)}}$  requires  $n_c n_f (n2^n + 2^{n+1})$  operations. Therefore,  $\frac{\partial \mathbf{t}}{\partial \mathbf{s}}$  and  $\frac{\partial \mathbf{t}}{\partial \Gamma}$  require  $2n_c n_f (n2^n + 2^{n+1})$  operations.

**Memory** A *forward pass* requires  $n_c 2^n + n_f 2^n + \#(\text{params.})$  floats and a *backward pass*  $n_f 2^n + n_c 2^n + \#(\text{params.})$  floats.

**Parameters** Using  $k$ -hop filters, a layer requires  $n_f$  bias terms and  $n_c n_f \sum_{i=0}^k \binom{n}{i}$  coefficients.

**Baselines** Graph convolutional layers for the undirected hypercube graph are a special case of powerset convolutional layers. Hence, they are in the same complexity class. A  $k$ -hop graph convolutional layer requires  $n_f + n_c n_f (k + 1)$  parameters.
